# Supplementary material
Source: PubMed Central journal article supplement (PMC3603347)
Supplement: NIHMS386146-supplement-1.pdf [file NIHMS386146-supplement-1.pdf]

Supplemental Figure 1. Isakson SH et al.

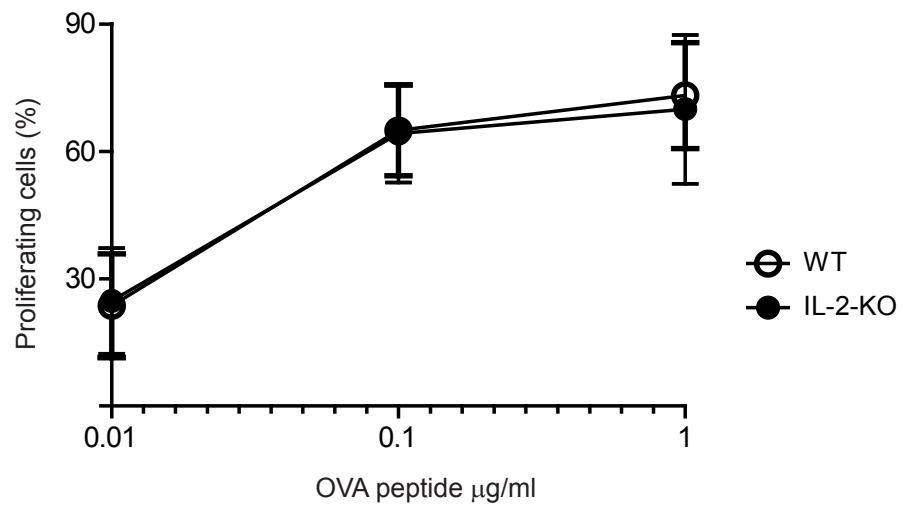

**Supplemental Figure 1: Various doses of OVA peptide.** To evaluate cDC functionality in the absence of overt T cell activation, flow-sorted cDCs were cultured with DO11.10 CD4<sup>+</sup> T cells and increasing dose of OVA peptide (323-339) for 3 days. Proliferation was measured by CFSE dilution. Naive DO11.10 CD4<sup>+</sup> T cells proliferated to a similar extent when stimulated by WT or IL-2-KO cDCs at all doses.
